# Supplementary material for: The Potential of Usnic-Acid-Based Thiazolo-Thiophenes as Inhibitors of the Main Protease of SARS-CoV-2 Viruses
Source: MDPI journal article supplement (doi:10.3390/v16020215), 2024-01-31

# The Potential of Usnic-Acid-Based Thiazolo-Thiophenes as Inhibitors of the Main Protease of SARS-CoV-2 Viruses

Olga I. Yarovaya <sup>1,\*</sup>, Aleksandr S. Filimonov <sup>1</sup>, Dmitriy S. Baev <sup>1,2</sup>, Sophia S. Borisevich <sup>2,3</sup>, Anna V. Zaykovskaya <sup>4</sup>, Varvara Yu. Chirkova <sup>5</sup>, Mariya K. Marenina <sup>1</sup>, Yulia V. Meshkova <sup>1</sup>, Svetlana V. Belenkaya <sup>1,4</sup>, Dmitriy N. Shcherbakov <sup>1,4,5</sup>, Maxim A. Gureev <sup>6</sup>, Olga A. Luzina <sup>1</sup>, Oleg V. Pyankov <sup>4</sup>, Nariman F. Salakhutdinov <sup>1</sup> and Mikhail V. Khvostov <sup>1</sup>

- <sup>1</sup> Department of Medicinal Chemistry, N.N. Vorozhtsov Novosibirsk Institute of Organic Chemistry SB RAS, 630090 Novosibirsk, Russia; alfil@nioch.nsc.ru (A.S.F.); mitja2001@gmail.com (D.S.B.); mareninamk@nioch.nsc.ru (M.K.M.); meshkova\_29@mail.ru (Y.V.M.); belenkaya.sveta@gmail.com (S.V.B.); dnshcherbakov@gmail.com (D.N.S.); luzina@nioch.nsc.ru (O.A.L.); anvar@nioch.nsc.ru (N.F.S.); khvostov@nioch.nsc.ru (M.V.K.)
- <sup>2</sup> Synchrotron Radiation Facility SKIF, G.K. Boreskov Institute of Catalysis SB RAS, 630559 Koltsovo, Russia; monrel@mail.ru
- <sup>3</sup> Laboratory of Chemical Physics, Ufa Institute of Chemistry, Ufa Federal Research Centre, 450078 Ufa, Russia
- <sup>4</sup> State Research Center of Virology and Biotechnology VECTOR, Rospotrebnadzor, 630559 Koltsovo, Novosibirsk Region, Russia; zaykovskaya\_av@vector.nsc.ru (A.V.Z.); pyankov\_ov@vector.nsc.ru (O.V.P.)
- <sup>5</sup> Institute of Biology and Biotechnology, Altay State University, 656049 Barnaul, Russia; varvara.chirkova@gmail.com
- <sup>6</sup> Laboratory of Bio- and Cheminformatics, St. Petersburg School of Physics, Mathematics and Computer Science, HSE University, 194100 St. Petersburg, Russia; max\_technik@mail.ru
- \* Correspondence: ooo@nioch.nsc.ru

## Supporting information

Analysis of molecular dynamics simulations

RMSD of atomic positions

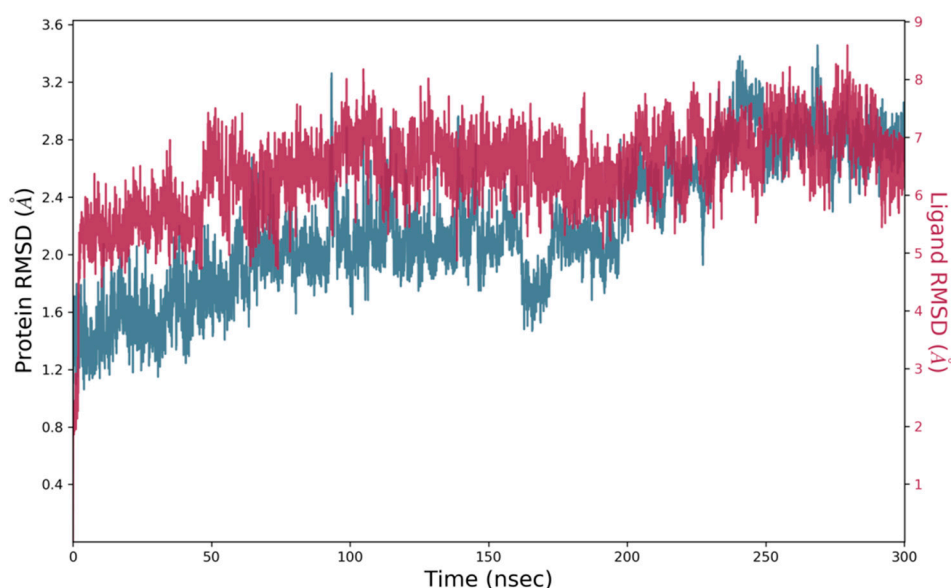

**Figure S1.** Fluctuation of the root mean square deviation (RMSD) values of atoms in the 3CLpro-(+)-3e complex.

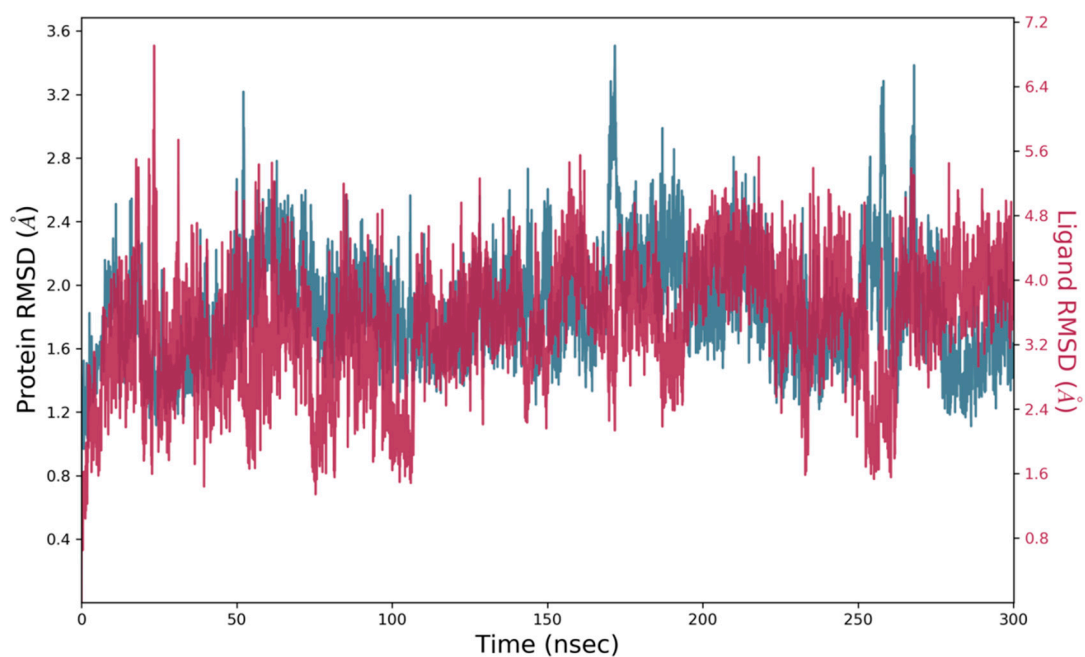

**Figure S2.** Fluctuation of the root mean square deviation (RMSD) values of atoms in the 3CLpro-(+)-3g complex.

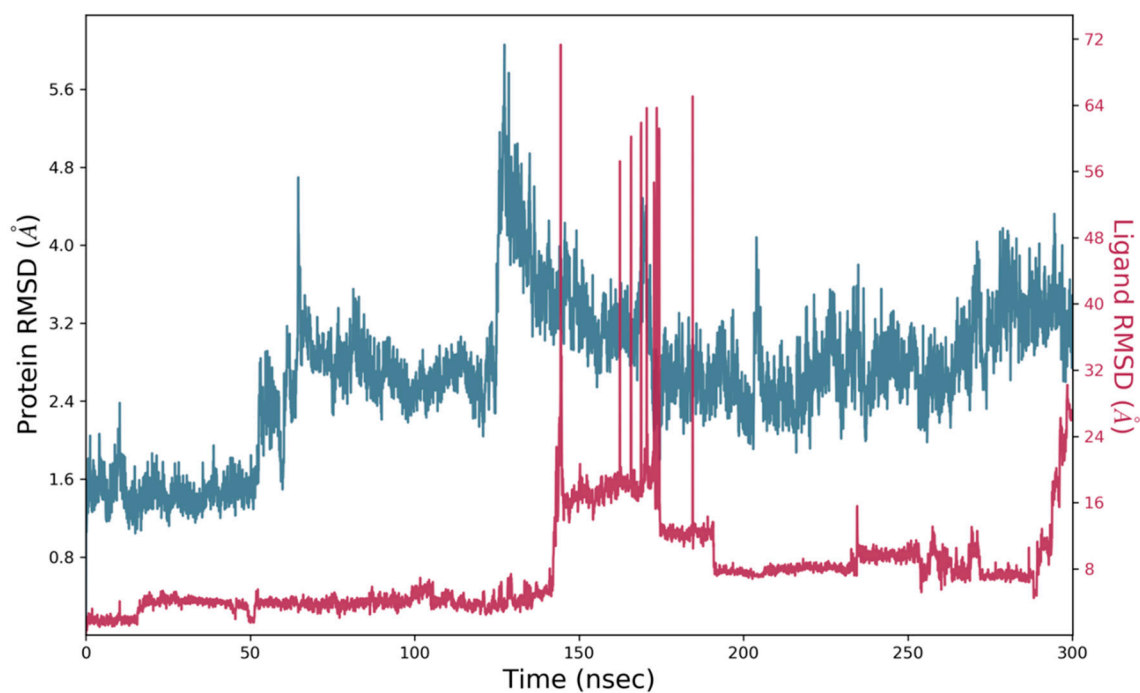

**Figure S3.** Fluctuation of the root mean square deviation (RMSD) values of atoms in the 3CLpro-(+)-1 complex.

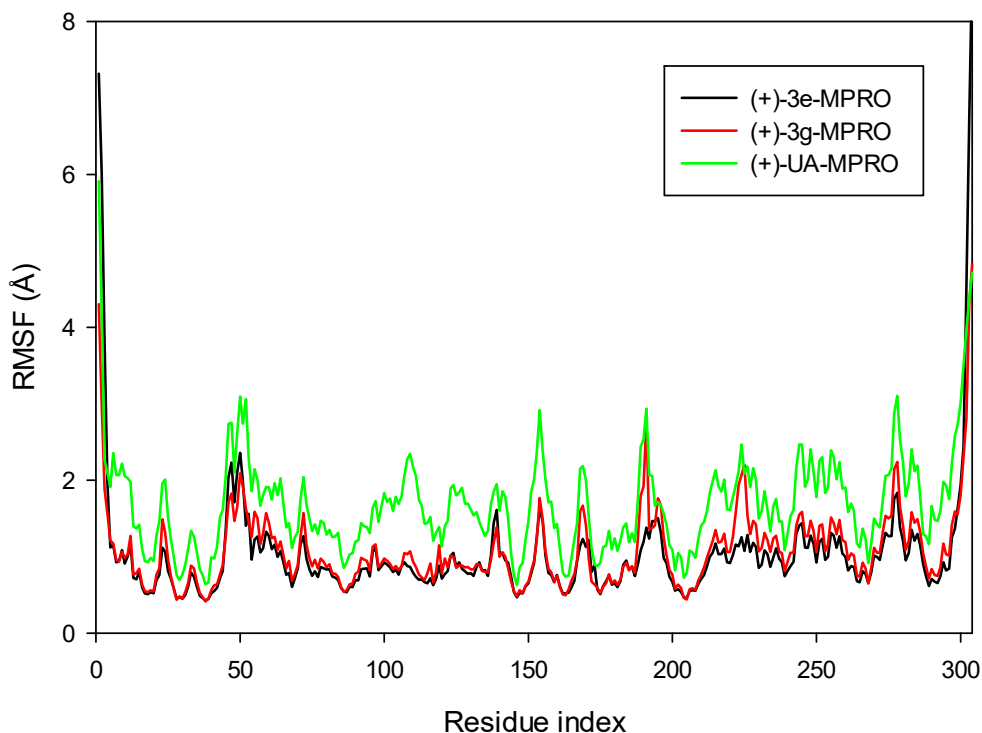

**Figure S4.** Root mean square fluctuation (RMSF) of changes in the position of MPRO subunit atoms with ligands in the binding site.

#### Registration of contacts between ligand and protein atoms

The figures below show histograms of registered contacts between ligand atoms and surrounding amino acid residues. 1.0 corresponds to 100%, i.e., one or another contact is recorded during the entire simulation time. Hydrogen bridges are detected at a distance of up to 2.5 Å, at an angle of  $\geq 120^\circ$  in the combination D(donor)—H - - A(acceptor) or  $\geq 90^\circ$  in the combination H - - A(acceptor)—X.

Hydrophobic contacts include three types of interactions:  $\pi$ - $\pi$  stacking,  $\pi$ -cation stacking, and other non-specific interactions, including contacts between hydrophobic amino acid residues and aromatic (and/or aliphatic) groups of the ligand. Contacts are recorded at a distance of 4.5 Å between aromatic and charged groups ( $\pi$ -cation),  $\pi$ - $\pi$  sandwich or “T-form” stacking; nonspecific hydrophobic interactions up to 3.6 Å.

Ionic interactions (or salt bridges) are detected at a distance of 3.4 Å between charged atoms. Water bridges correspond to contacts of the ligand with the atoms of amino acid residues through a water molecule. Bonds are recorded at a distance of up to 2.8 Å, at an angle of  $\geq 110^\circ$  in the combination D(donor)—H - - A(acceptor) or  $\geq 90^\circ$  in the combination H - - A(acceptor)—X.



**Table S1:** Spectra NMR  $^1\text{H}$  of **3a-3d** ( $\text{CDCl}_3$ ,  $\delta$ ):

| No        | 3a                                                                                | 3b                                                                                | 3c                                                                                 | 3d                                                                                  |
|-----------|-----------------------------------------------------------------------------------|-----------------------------------------------------------------------------------|------------------------------------------------------------------------------------|-------------------------------------------------------------------------------------|
| Structure | 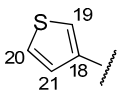 |  |  |  |
| H-14      | s 7.12                                                                            | s 7.08                                                                            | s 7.09                                                                             | s 7.23                                                                              |
| H-17      | s 7.78                                                                            | s 7.81                                                                            | s 7.73                                                                             | s 8.16                                                                              |
| H-19      | s 7.43                                                                            | d 7.08<br>(J=3.4 Hz)                                                              |                                                                                    | d 7.19<br>(J=4.9 Hz)                                                                |
| H-20      | d 7.46<br>(J=4.9 Hz)                                                              | m 6.94                                                                            | d 6.72<br>(J=5.3 Hz)                                                               | m 6.79                                                                              |
| H-21      | m 7.31                                                                            | d 7.27<br>(J=5.0 Hz)                                                              | d 7.14<br>(J=4.9 Hz)                                                               |                                                                                     |
| H-22      |                                                                                   |                                                                                   | s 2.23                                                                             | s 2.46                                                                              |
| NH        | bs 8.99                                                                           | bs 9.48                                                                           | bs 9.11                                                                            | ---                                                                                 |
| OH-3      | s 18.79                                                                           | s 18.78                                                                           | s 18.78                                                                            | bs 18.82                                                                            |
| OH-7      | ---                                                                               | ---                                                                               | ---                                                                                | s 12.27                                                                             |
| OH-9      | s 10.28                                                                           | s 10.27                                                                           | s 10.26                                                                            | s 10.27                                                                             |

**Table S2:** Spectra NMR  $^1\text{H}$  of **3e-3g** ( $\text{CDCl}_3$ ,  $\delta$ ):

| No        | 3e                                                                                  | 3f                                                                                  | 3g                                                                                    |
|-----------|-------------------------------------------------------------------------------------|-------------------------------------------------------------------------------------|---------------------------------------------------------------------------------------|
| Structure | 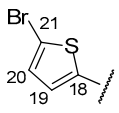 |  |  |
| H-14      | s 7.11                                                                              | s 7.04                                                                              | s 7.27                                                                                |
| H-17      | s 7.58                                                                              | bs 8.12                                                                             | s 8.08                                                                                |
| H-19      | d 6.77<br>(J=3.8 Hz)                                                                | s 7.04                                                                              | d 7.34<br>(J=4.5 Hz)                                                                  |
| H-20      | d 6.86<br>(J=3.8 Hz)                                                                |                                                                                     | d 7.98<br>(J=4.5 Hz)                                                                  |
| H-21      |                                                                                     | s 7.19                                                                              |                                                                                       |
| H-22      |                                                                                     |                                                                                     |                                                                                       |
| NH        | bs 9.06                                                                             | ---                                                                                 | s 12.78                                                                               |
| OH-3      | s 18.79                                                                             | s 18.79                                                                             | bs 18.78                                                                              |
| OH-7      | ---                                                                                 | ---                                                                                 | s 12.49                                                                               |
| OH-9      | s 10.29                                                                             | s 10.40                                                                             | s 10.23                                                                               |

**Table S3:** Spectra NMR  $^{13}\text{C}$  of **3a-3d** ( $\text{CDCl}_3$ ,  $\delta$ ):

| No        | 3a                                                                                | 3b                                                                                | 3c                                                                                | 3d                                                                                  |
|-----------|-----------------------------------------------------------------------------------|-----------------------------------------------------------------------------------|-----------------------------------------------------------------------------------|-------------------------------------------------------------------------------------|
| Structure | 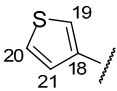 |  |  |  |
| C-17      | 137.90                                                                            | 142.67                                                                            | 136.47                                                                            | 138.62                                                                              |
| C-18      | 136.51                                                                            | 138.12                                                                            | 131.71                                                                            | 136.51                                                                              |
| C-19      | 124.77                                                                            | 137.70                                                                            | 138.95                                                                            | 130.36                                                                              |
| C-20      | 126.09                                                                            | 127.87                                                                            | 126.73                                                                            | 126.38                                                                              |
| C-21      | 126.59                                                                            | 129.21                                                                            | 130.60                                                                            | 142.34                                                                              |
| C-22      |                                                                                   |                                                                                   | 13.95                                                                             | 15.35                                                                               |

**Table S4:** Spectra NMR  $^{13}\text{C}$  of **3e-3g** ( $\text{CDCl}_3$ ,  $\delta$ ):

| No        | 3e                                                                                  | 3f                                                                                  | 3g                                                                                    |
|-----------|-------------------------------------------------------------------------------------|-------------------------------------------------------------------------------------|---------------------------------------------------------------------------------------|
| Structure | 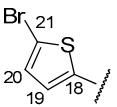 |  |  |
| C-17      | 135.97                                                                              | 138.68                                                                              | 135.56                                                                                |
| C-18      | 139.39                                                                              | 138.72                                                                              | 146.60                                                                                |
| C-19      | 128.64                                                                              | 131.84                                                                              | 130.58                                                                                |
| C-20      | 129.92                                                                              | 110.30                                                                              | 128.13                                                                                |
| C-21      | 115.29                                                                              | 125.35                                                                              | 149.84                                                                                |
| C-22      |                                                                                     |                                                                                     |                                                                                       |

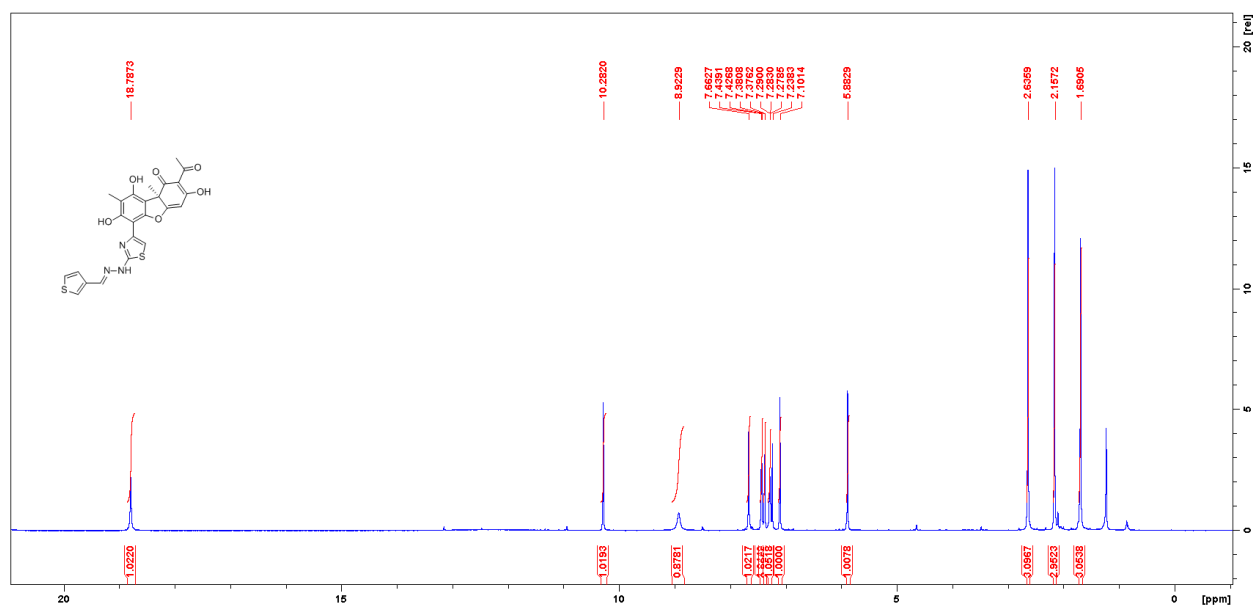

Figure S6. <sup>1</sup>H NMR Spectrum of compound (+)-3a

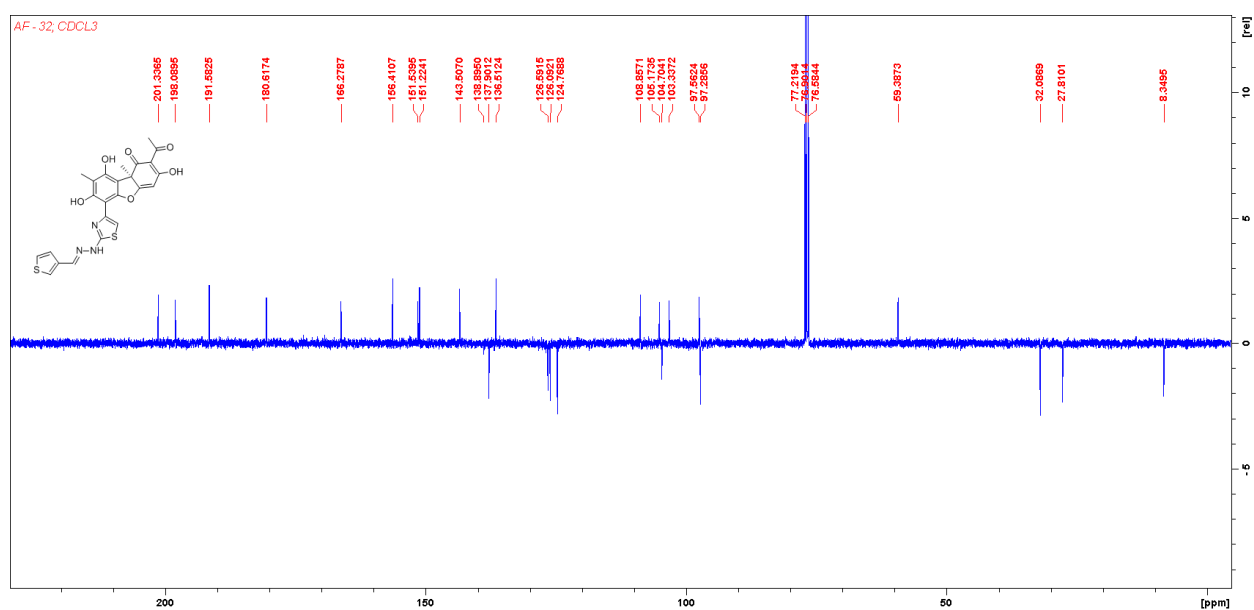

Figure S7. <sup>13</sup>C NMR Spectrum of compound (+)-3a





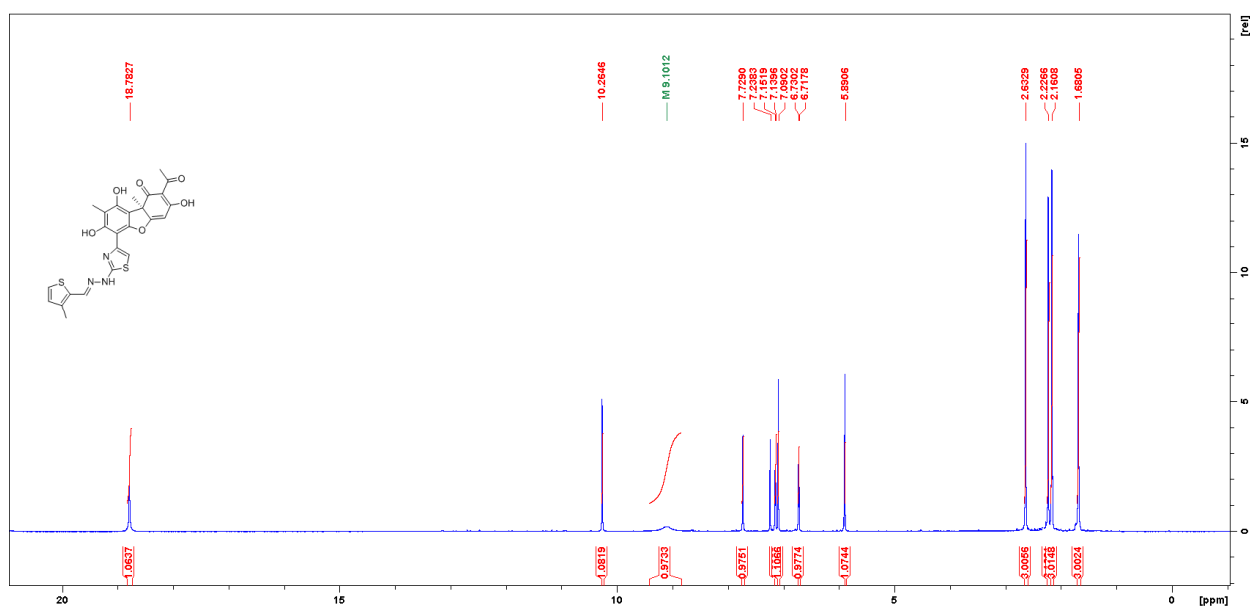

Figure S10. <sup>1</sup>H NMR Spectrum of compound (+)-3c

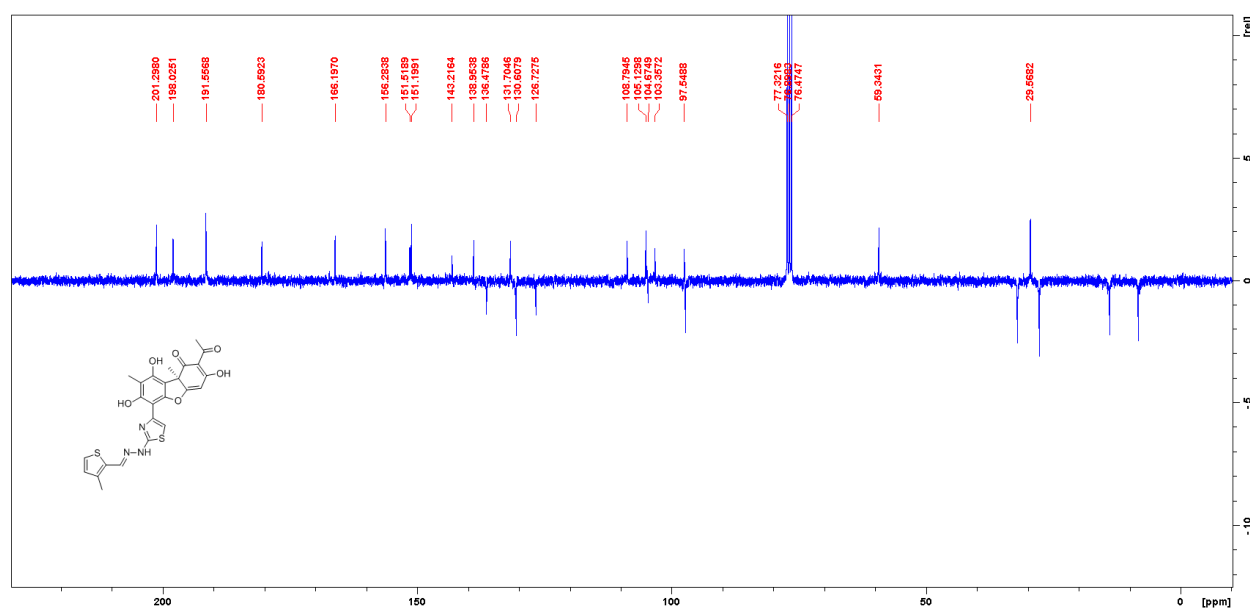

Figure S11. <sup>13</sup>C NMR Spectrum of compound (+)-3c

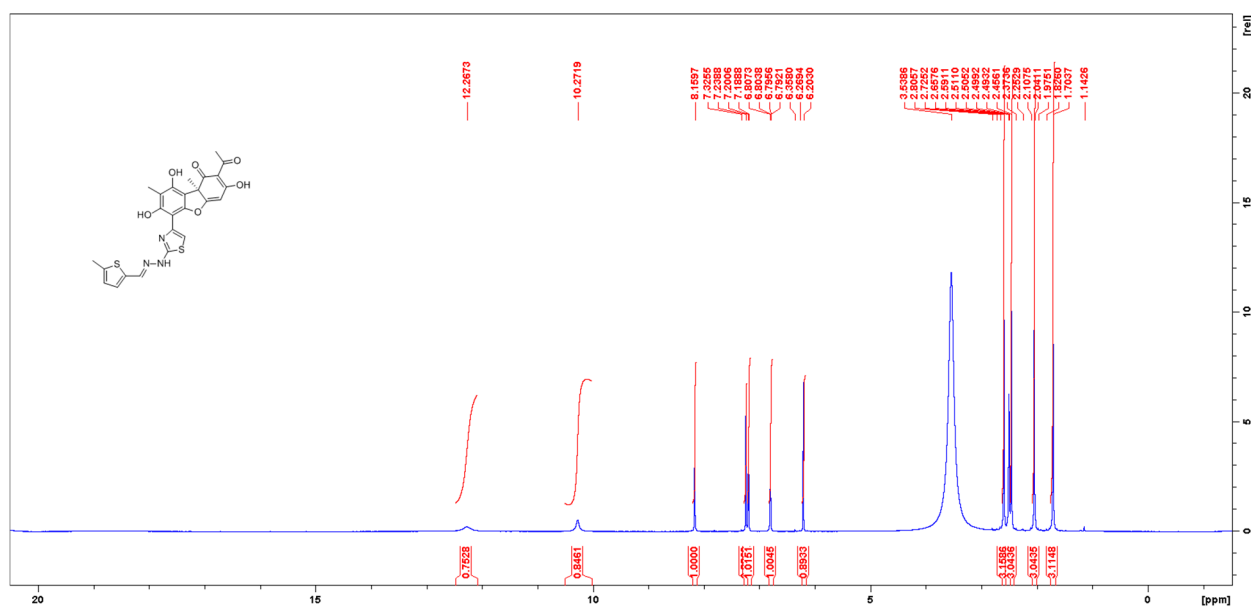

Figure S12.  $^1\text{H}$  NMR Spectrum of compound (+)-3d

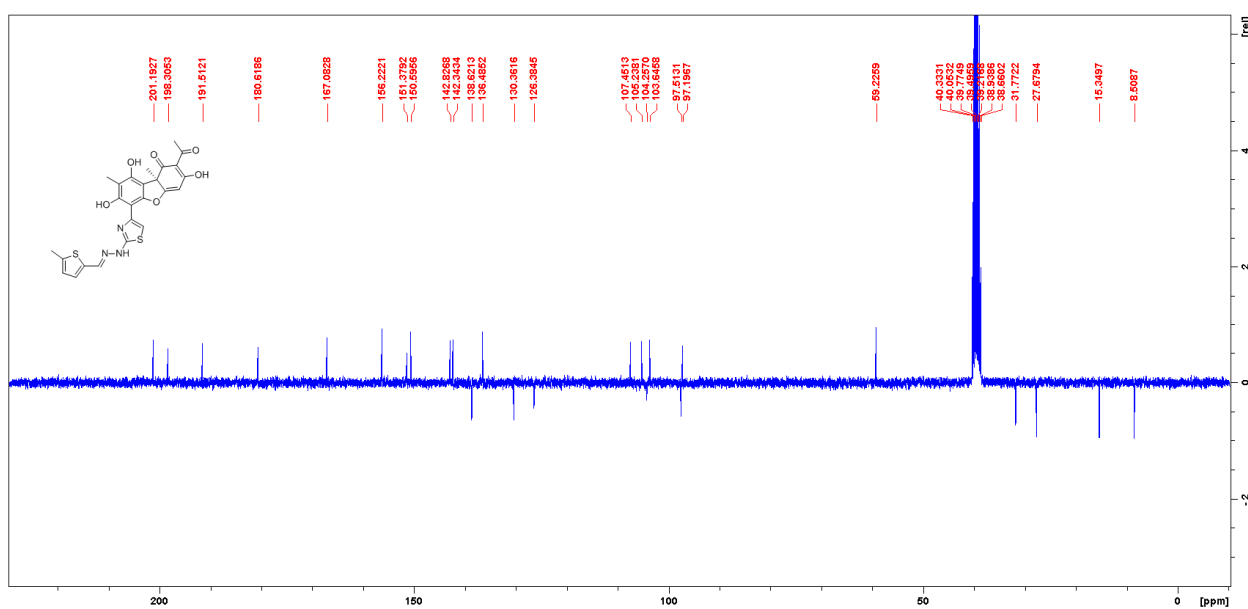

Figure S13.  $^{13}\text{C}$  NMR Spectrum of compound (+)-3d

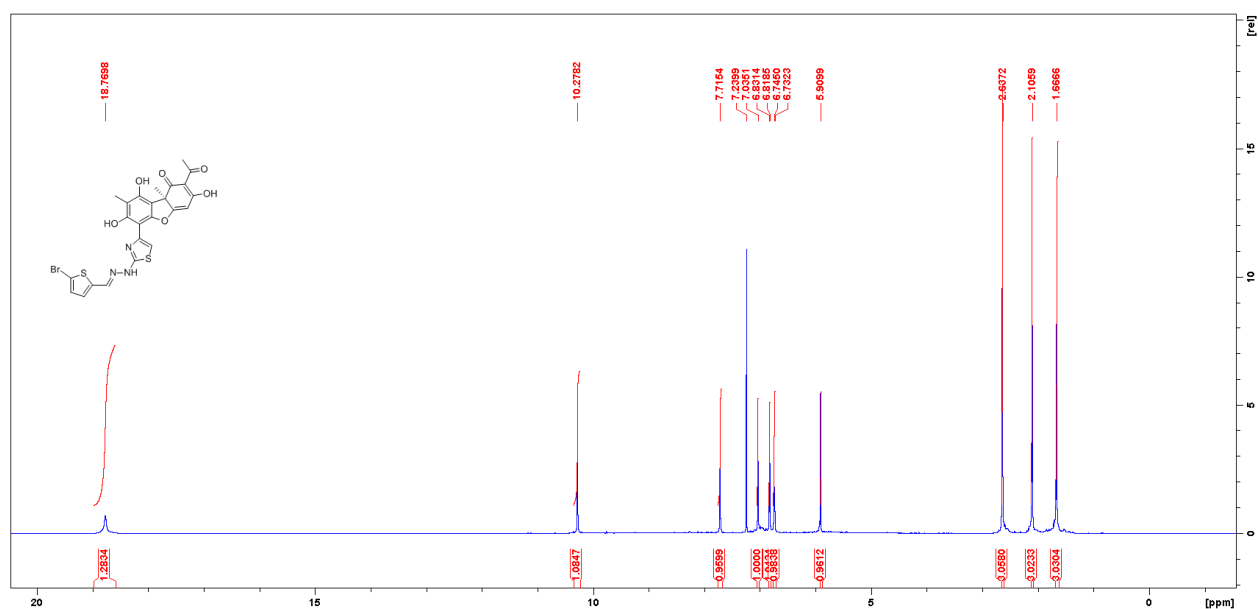

Figure S14. <sup>1</sup>H NMR Spectrum of compound (+)-3e

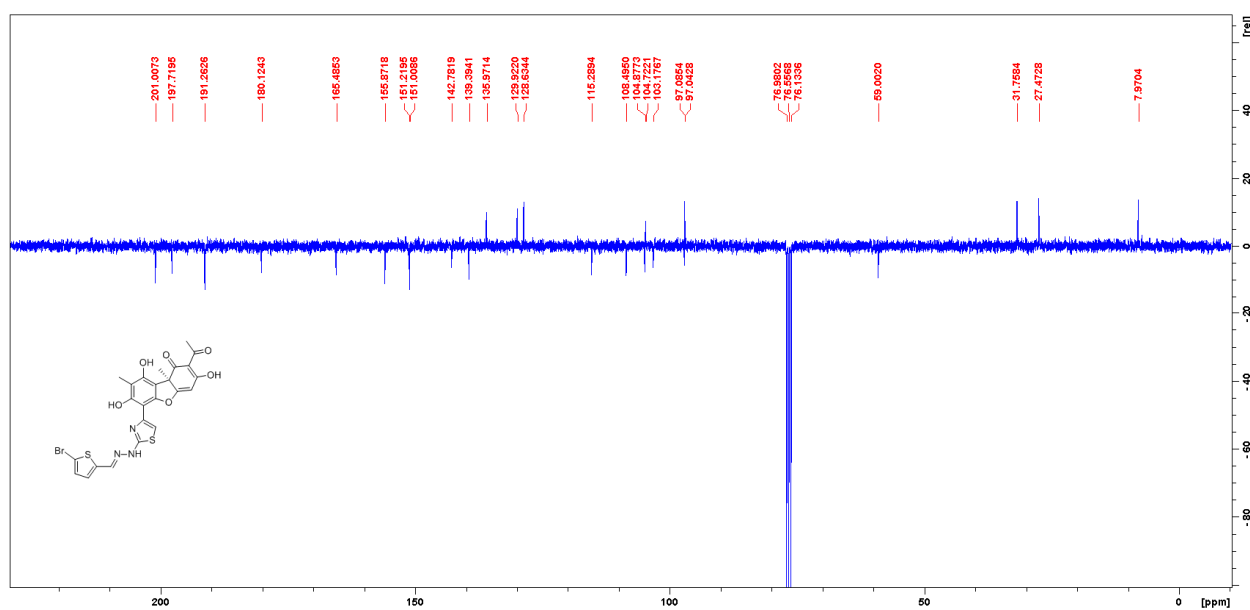

Figure S15. <sup>13</sup>C NMR Spectrum of compound (+)-3e

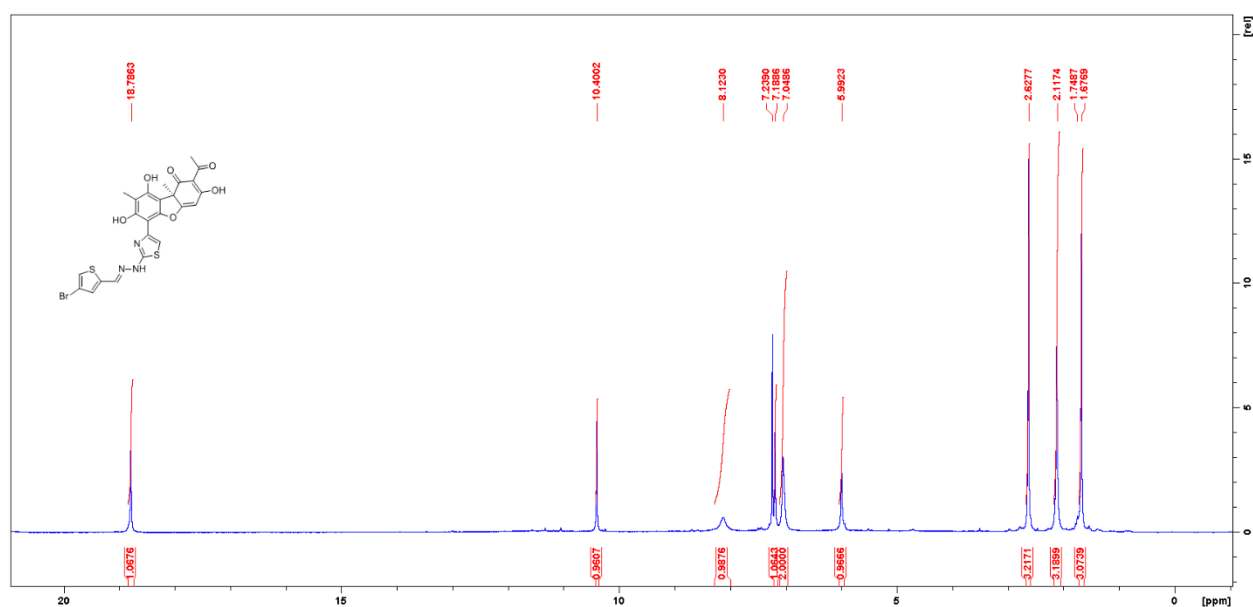

**Figure S16.** <sup>1</sup>H NMR Spectrum of compound (+)-3f

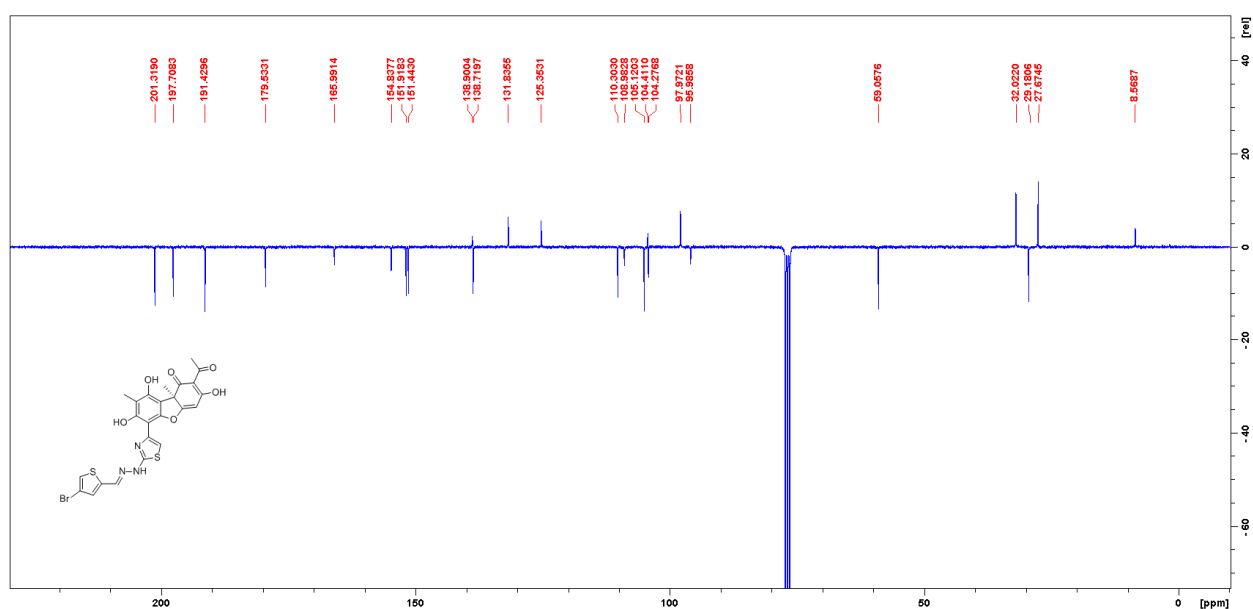

**Figure S17.** <sup>13</sup>C NMR Spectrum of compound (+)-3f

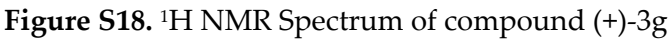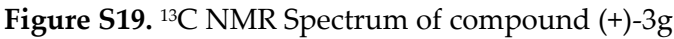

Supplement: s1 [file s1]
